# Supplementary material for: Assessing London CO 2 , CH 4 and CO emissions using aircraft measurements and dispersion modelling
Source: Copernicus journal article supplement (doi:10.5194/acp-2018-1033), 2018-10-15
Supplement: Supplementary file [file acp-2018-1033-AC1-supplement.pdf]

## Author response to referee comments

We would like to thank both referees for their constructive comments and insight. They have provided us with plenty of food for thought, both in terms of the tone of the paper and its place within the wider context of the field. Below we respond to each referee individually, however as both referees raised similar points in many places we have combined our replies into a single document.

### **Referee 1:**

Pg 1 ln 19-20. Consider rephrasing – many in the atmospheric greenhouse gas community are recognizing that the value of atmospheric measurements in the emissions reporting context is in working with existing inventories to evaluate and improve emissions reporting. Presenting these measurements as “independent verification” pitted against inventory methods is problematic.

A good point – amended to better emphasise the potential synergy between top-down emission estimates and bottom-up inventories

Pg 2 ln 3-10. Please add some discussion here about sources/sinks that are not included in the NAEI. For CO<sub>2</sub> this is mainly biogenic fluxes, which are noted later to be critically important. Please also include a discussion of what sources of CO and CH<sub>4</sub> are included in the inventory, and which are not. For example, I suspect that oxidation of biogenic VOCs is not included in the CO inventory. These may be negligible in March, but should still be mentioned. As for the CH<sub>4</sub> inventory, does it include all sources, or only anthropogenic sources, and how significant might non-anthropogenic sources be?

A brief paragraph on the natural sources of these gases has been added. For CH<sub>4</sub> and CO the impact of natural sources on the results of this study is likely to be small, but as discussed later in the paper this is not the case for CO<sub>2</sub>. Rather than repeat it here, we refer the reader to the relevant section for this discussion.

Pg 2 lines 21-22. While it is true that comparison of top-down estimates with bottom up inventories is one important way to use the atmospheric observations, it is certainly not true that the only use of these measurements is to evaluate inventories! Please rephrase.

We certainly didn't intend to imply that the measurements themselves were only useful for this purpose, only that the mass balance flux calculated through the downwind sampling plane is not particularly informative in isolation. This value, which physically represents the mol s<sup>-1</sup> passing through some arbitrary vertical plane above some defined background mole fraction, needs to be related to the emissions for a given city/region/source for it to have any meaning. The lack of clarity in this section was also highlighted by referee 2 – it has been edited to address both comments.

Pg 4 ln 25. “an altitude-latitude plane.”

Corrected

Pg 5 ln 6-20. Please add a sentence that explains in plain English the principle of what the equations do, rather than requiring the reader to wade through the equations to figure out the principle (although the detail of the equations is necessary too).

We've reordered this section to try and make it flow better.

Pg 5 section 3. Please add some detail about the NAEI. It is spatially explicit, but does it have temporal variability? If so, what kind of temporal variability and how reliable might that be? Diurnal cycles? Seasonal cycles? Weekday/weekend? Are there any existing estimates of the quality of the

inventory (and perhaps the quality is different for the different gases)? This becomes important in trying to understand the differences between the inventory and the observations.

The NAEI only contains annual averages – we've added a sentence to explicitly state this and alluded to the fact that this is likely to be a source of model-measurement disagreement for a single-flight case study.

Pg 6 ln 24-25. Again, please add a sentence that explains the principle in plain English rather than forcing the reader to work it out from the equations. Eg “The mole fraction enhancement is calculated by subtracting the background value”.

Added

Pg 6 ln 24-32. The choice of background is known to be a key uncertainty in this type of measurement (eg. Cambaliza et al 2013; Heimburger et al, 2017). Unfortunately the research community has not yet come to any conclusion as to how to resolve this. The simple method of taking an average of the values measured on the downwind edges of the plume (as is done here) is far from perfect, even if it might be the best available option given the measurements that have been done. Heimberger et al (2017) showed that there can be significant differences in the values on the two edges, and that in that case, a simple improvement would be to linearly interpolate between the two edges to evaluate background. It is also entirely possible that the background is not uniform and that there are plumes from upwind sources that are not detected because they are inside the urban plume. From Figure 4, it's apparent that there are a lot of methane emissions upwind of the city that could cause this. Further, there's an implicit assumption that there are no emissions occurring in the footprint of the edge measurements. This is clearly a bad assumption for this dataset, and so the edge measurements will be biased high (or perhaps low in the case of CO<sub>2</sub> if there is significant drawdown in the edges), resulting in an underestimate of the urban emission rate (or perhaps overestimate in the case of CO<sub>2</sub>). A forthcoming paper (in last phases of review) will discuss this further, but unfortunately is unlikely to be published in time to be referenced in this paper. My suggestion is to: (1) Add a figure that shows clearly the background values, how they were chosen, and whether there is any difference between the two edges. (2) A plot of the upwind measurements could also be included to show whether there is any particular concern with plumes coming in from upwind for this dataset. (3) Add figures that show the NAEI CO<sub>2</sub> and CO emissions, similar to that shown in Figure 4 for CH<sub>4</sub>, to give a sense of upwind and edge emissions and how important they might be. (4) If there are no particular concerns with the points above, then stick with the current choice of background. (5) Add some discussion about the uncertainty associated with choice of background and how it might influence the results.

We absolutely agree with the referee that this is the key issue with the mass balance method – this is what motivated us to develop the flux-dispersion method which we think is less susceptible to the biases it can cause. The fundamental problem with applying the mass balance method here is that there are many emission sources outside London that contribute to mole fraction enhancements in the downwind plane. Hypothetically, to deal with this issue in the context of the mass balance method, one either needs to account for the influence of these emissions in the background mole fraction (such that all downwind enhancements are a result of Greater London emissions) or include them in the aggregated inventory emission total against which the top-down flux is compared. Our original draft focussed on the difficulties associated with the latter approach – we have redrafted Sects. 3.2 and 3.3 to include discussion on the former approach too.

One thing that is worth clarifying regarding the comment made here is that Pg 6 L24-32 describes the approach taken in the flux-dispersion method. However the issues raised here by the referee are more relevant to the mass balance method discussed in Sect. 3.2. The flux-dispersion method does take into account emissions in the footprint of the edge measurements, and it is made explicit in this section that the results obtained using this approach pertain to the emissions from the areas sampled in Fig. 4b relative to the emissions sampled in Fig. 4a.

We have repeated the flux-dispersion analysis with an interpolated (rather than averaged) background value used across each transect, and each ratio changed by less than 0.01. We have made reference to this in Sect. 3.1.1. Similarly we repeated the mass balance method with interpolated background values and found this slightly increased the derived fluxes, but in all cases the difference was less than 7%. We have included these values in Sect. 3.2.2.

On the specific points made above:

- 1) We have added a table containing the background values used in the flux-dispersion method as we thought this shows them more clearly than a figure.
- 2) Unfortunately the upwind sampling was nearly all either out of the boundary layer or dipping in and out of the top of it, so this data is not really useful for defining a background here.
- 3) These plots have been added to Fig. 4.
- 4) As the flux-dispersion method accounts for the emissions in the background footprint, the key to defining the background is to set a criterion that ensures emission from the area of interest (in this case Greater London) represent the most significant difference between the in-plume and background footprints. Comparing Fig. 4a and Fig. 4b we feel that the background choice here achieves this. This is discussed further in our response to Referee 2 below.
- 5) We have clarified the discussion in Sect. 3.1.1 of how the choice of background influences the flux-dispersion results, emphasising the impact of this choice on the selectivity of the results towards London. For the mass balance method we have added discussion on the choice of background to Sects. 3.2 and 3.3.

Pg 7 ln 24-30. Looking at figure 5, there's a clear spatial mismatch in the plume location between the obs and simulation. What might be the explanation for this? Given this mismatch, is it reasonable to average over the whole thing and then compare the two methods? This mismatch seems to imply a larger uncertainty than that given by just comparing the means.

This is a good point that deserves discussion. There are two obvious potential causes:

- 1) The spatial distribution of the inventory is incorrect, such that for all three species it underestimates emissions from south London and/or overestimates emissions from north London.
- 2) The spatial distribution of emissions in the inventory is broadly correct, but inaccuracy in the model wind field causes the simulated plume to be advected to a slightly more northerly position.

Cause 2) seems to be the more plausible, given that the simulated plume is north of the measured plume for all three species, despite the different source mixes for each species (in particular CH<sub>4</sub>). On the other hand, the model wind direction compares fairly well to the measured winds at the aircraft sample locations, and any disagreement between them is actually in the opposite direction (i.e. the

measured winds are more southerly). However, it still seems like too much of a coincidence for all three species to be incorrectly distributed in such a way to generate exactly the same offset in plume position, so we believe inaccuracies in the UKV wind field (prior to reaching the sampling plane) are indeed the likely cause of this mismatch.

The uncertainty associated with the model wind field is one of the main points raised by Referee 2 – please see below for a discussion of this.

Pg 8. Please emphasize throughout the discussion of the comparison that this analysis is for a single flight, and that care should be taken in drawing conclusions about the integrity of the inventory from a single comparison on a single day. Previous authors have shown that when multiple flights are considered, there can be large differences in the calculated flux that are likely due to uncertainties in the top-down flux estimate rather than day-to-day differences in the actual emissions.

Section edited to emphasise this

Pg 8 In 10-23. I agree that an incorrect spatial pattern in the inventory could explain at least part of the difference. However, I suspect that the choice of background may be more important and be biasing the top-down estimate low. See earlier comments. Does the NAEI include temporal variability and could lack of temporal variability in the NAEI be an explanation for the difference? See earlier comment.

We have edited this section to emphasise the likelihood that temporal variability in emissions (which the NAEI doesn't include) is a likely candidate for this difference. See above for our discussion regarding the choice of background – this can clearly bias the mass balance emission estimates but the flux-dispersion method takes sources within the background footprint into account. Biases associated with inaccuracy in simulated background footprint are discussed at the beginning of Sect. 3.1.2.

Pg 8 In 24 – 35. It's clear than biogenic CO<sub>2</sub> will have an enormous influence on the calculated flux, and that it can bias the CO<sub>2</sub> background quite dramatically (see e.g. Turnbull et al 2015, Cambaliza et al 2013). The statement here needs to be much stronger, "treated with caution" is an understatement! It is simply not possible to compare a flux based on total CO<sub>2</sub> with an anthropogenic CO<sub>2</sub> inventory unless the biogenic component can be accounted for, likely by either having a good biogenic model or being able to separate biogenic and fossil fuel CO<sub>2</sub> in the observations (e.g. using 14C or CO). I would say something like "comparison with the NAEI is not appropriate for this dataset".

Edited to make statement stronger

Pg 9 In 28-34. See earlier comments about choice of background. The same biases occur for this method as for the other method.

This point is discussed in response to the earlier comment

Pg 10 Section 3.2.2. Can you come up with a total emission flux for the flux dispersion method, so that the total flux from each method can be compared more directly? As written, the comparison is between the obs/model ratio for each of the two methods. Thus it can't be determined whether the difference in the ratio occurs because the observed flux rate is different, or the modeled flux rate is different. You argue that the difference is in the modeled flux (actually that you've defined the modelled footprint differently in the two cases). By making a slightly different comparison, this could be argued more strongly.

When we initially started developing the flux-dispersion method, our first approach was to krig the simulated mole fractions and compare total kriged fluxes through the downwind plane. However, we moved away from doing this because by definition any difference in the flux ratios derived in this manner from the overall flux ratios calculated here purely results from the interpolation/extrapolation of sparse data. While the overall flux ratios calculated here are essentially the average of individual transect flux ratios weighted by flux density enhancement, using the kriged flux ratios this average is weighted by a somewhat arbitrary factor relating to the location of the transects relative to each other on the sample plane. In any case, returning to this approach would not tackle the question posed above, because it uses the measured flux calculated with the mass balance method (i.e. the modelled flux is the only value that changes between the two methods).

We have made changes throughout Sect. 3.2 and 3.3 regarding the relationship between the choice of background and the choice of inventory aggregation area (i.e. the “modelled flux”) for the mass balance method. Hopefully this explains better the issue with the application of the mass balance method in this study.

Pg 10 section 3.3. This difference in how the footprint is defined is a good candidate for the difference. There are potentially ways to resolve this in the mass balance method. A good start would be to make an estimate of the footprint of the mass balance, rather than assuming that the footprint is an arbitrary metropolitan boundary.

It is not clear to us how an unambiguous definition could be made which separates emissions that contribute to the plume from emissions that contribute to the background (as many source areas contribute to some extent to both). This is discussed at length in response to Referee 2’s main point 2).

Pg 11. Conclusions. Please restate the point that the CO<sub>2</sub> comparison is invalid because biogenic CO<sub>2</sub> is not accounted for. Otherwise the conclusions are very nice.

Point added

Figure 1. Please add a larger scale inset to show where this is in relation to the UK, Ireland, etc. Not all of us are well-versed in English geography!

Inset added

**Referee 2:**

1) My understanding is that the new approach is merely a combination or trade-off between two traditional approaches : the mass balance approach and the atmospheric transport inversion (Brioude et al. 2013 provide an example of inversion applied to aircraft data around a city). Conceptually, the major difference between this approach and the traditional atmospheric transport inversion is related to the fact that the observed variables to be fitted by rescaling the surface fluxes are fluxes at the measurement locations rather than concentrations. This requires some additional assumptions for the computation of such fluxes, but this enables to account for wind measurements when assimilating the observations. Another difference is that rather than assimilating all local fluxes at the aircraft measurement locations in a Bayesian statistical inversion framework, the method consists here in summarizing them into an average value which is used to rescale the map of surface fluxes. This simplification could lead to a loss of information but it can also help control the inversion behavior. One of the strength of traditional atmospheric inversions and of this new approach is the ability to

extrapolate the information from the sparse measurements by accounting for the atmospheric transport and for the emissions spatial distribution, while the traditional mass balance approach makes coarser extrapolations (here based on a kriging technique).

I think that such a comparison to the atmospheric inversion is worth being discussed since the comparison to the mass balance approach only could lack of hindsight regarding the panel of methods that have been tested to exploit aircraft data. Furthermore, from my point of view, this new approach is closer to the atmospheric transport inversion than to the mass balance approach.

This is a very fair point – in many ways this technique is more similar to previous transport inversion studies than it is to those that use a mass balance method. The focus on mass balancing in the introduction probably reflects the process we went through in developing the technique: we started with a conventional mass balance calculation, but in attempting to resolve the issue of surrounding emission sources each iteration of the technique increasingly revolved around use of the NAME air histories.

We have edited the introduction to better place this method in the context of other approaches used, particularly with regard to atmospheric transport inversions. Flux estimation using a full atmospheric transport inversion is beyond the scope of this study, however a separate study which includes emission estimates for the GAUGE flights derived using a trace gas inversion (employing a hierarchical Bayesian framework) is currently in preparation.

2) One of my main concerns is that by rescaling the total of the NAEI emissions according to measurements whose surface footprint extends well beyond the Greater London area, the new approach does not really inform on the emissions from this area either. Given the distances from the section A-B to London, and as illustrated by Figure 4, the results from this method are driven by emissions from a large part of the South of England that extends to the sea, despite the removal of the "background" concentrations (whose sensitivity to the Western part of the South of England seems much smaller than that of the measurements used to constrain the estimate of emissions according to Figure 4).

Yes, a disadvantage of this new technique is that it is not entirely selective of emissions from a single source area. The key to achieving results relevant to the area of interest is to choose appropriate criteria to define the background, as described in Section 3.1.1. Using the contours in Fig. 4c as a guide it appears reasonable to claim that emissions from the London conurbation represent the most significant influence on the difference between the in-plume and background fluxes, thus supporting the choice of background threshold used here.

This point highlights the key issue with applying the mass balance method in this case, as similarly this is not selective of Greater London emissions but is influenced by emissions from a much wider (but ill-defined) area. In this case the lack of selectivity actively biases the results, an issue which is resolved by applying the new flux-dispersion method. However that both methods suffer from this lack of selectivity was not obvious enough in the original paper – this has now been edited throughout to make it clear.

The computations are conducted in March so that ignoring the natural CO<sub>2</sub> fluxes might be fine. But similar computations based on the same aircraft campaigns in spring and summer would be highly hampered by the CO<sub>2</sub> uptake upwind and downwind London (not only by the differences between the natural fluxes within the urban part of the measurement footprint vs. within the background footprint that are discussed in section 2.3). While the lack of account for natural CO<sub>2</sub> fluxes is mentioned in

section 3.1.2, the major issues raised by these fluxes for spring / summer deserve a discussion, and the topic could deserve some indications in the method sections (in particular in section 2.3) and maybe a coarse look at estimates of the CO<sub>2</sub> natural fluxes in the UK.

Yes natural fluxes would be much more significant in summer, and probably cannot be taken as negligible here. We have edited the paper to make a stronger statement regarding the inappropriateness of direct comparison with the NAEI for CO<sub>2</sub> (this point has been particularly highlighted by Referee 1) and have added a paragraph discussing the inferences that can and cannot be drawn regarding natural fluxes by considering the results for CO<sub>2</sub> and CO together (more on this in response to the specific point raised below).

I feel that the manuscript is a bit severe with the mass balance approach by crudely attributing the flux estimate from this method to the Greater London area, and maybe by deriving an estimate of the background concentrations for this approach in a crude way. More cautious interpretations of the flux estimates from this approach are usually made, especially for situations like that of London. I would recommend the authors to comment on the paper by Font et al. (2015) who also made estimates of the emissions from London using aircraft data, and who used FLEXPART simulations to assess the footprint of their measurements. O'Shea et al. (2014) also used NAME to analyze the footprint of their aircraft measurements, and discussed the issue that would be raised by the crude assumption that these measurements would correspond exactly to the greater London area.

It is certainly true to say that aggregating the emissions over the Greater London area is a crude approach. However, it is not clear to us that a more robust method for defining this footprint exists. Font et al. (2015) are able to define a footprint for their measurements using FLEXPART, but their Integrative Mass Boundary Layer method relies on a completely different calculation to the mass balance method used here. They essentially measure the difference between the rate of change in CO<sub>2</sub> concentration within the boundary layer and the rate of entrainment of air from above. This yields a surface flux per unit area, which can then be related to the area the air has travelled over using FLEXPART. In the mass balance approach used here we calculate a bulk flux (i.e. not per unit area) through the downwind sampling plane, relative to our choice of background mole fraction.

The problem here is that, while emissions from certain areas clearly contribute only to the plume, and emissions from certain others contribute only to the background, the majority of the emissions over the air history contribute to both but to different extents. This can clearly be seen in Fig. 4 – summing all of the emissions covered by the air history in Fig. 4b would clearly overestimate the calculated flux (even if they are weighted by residence time, as in Font et al., 2015), as most of these areas are also covered by the air history in Fig. 4a and so contributed to the background. Although this figure relates to the in-plume/background periods for the flux-dispersion method (which is slightly different to the background used in the mass balance calculation taken from the kriged plane), it demonstrates the difficulty in defining any objective criteria for determining the aggregation area. One could subtract the background air history from the in-plume air history and define some threshold value above which a grid square would be included in the aggregated flux total, but the choice of such a threshold would be just as arbitrary as simply using the Greater London boundary. We have added a discussion of this to Section 3.3.

O'Shea et al (2014) took a different approach, using NAME to discard cells from the kriged plane which didn't contain measurements of air that had passed over Greater London. In other words, they stick to aggregating bottom-up emissions over the Greater London area, but try to downscale the kriged flux to represent this area. However, this doesn't solve the fundamental problem with the mass

balance approach, as grid squares with an influence from Greater London can still be influenced by sources surrounding Greater London as well. In the case study presented here, the in-plume measurements were all influenced by London to some degree (as can be seen by comparing Fig. 2 and Fig. 3), so this downscaling approach is not easily applicable.

Therefore, I would be ready to agree that the mass balance approach and its associated type of aircraft measurement tracks is not very well adapted to the monitoring of the emissions from a city surrounded by other cities and productive ecosystems, especially if flight regulations impose measurements to be conducted far downwind. However, I feel that by relying on the same type of measurements and by avoiding to solve for the spatial distribution of the emissions, the new approach may bear the same fundamental limitation which is the lack of ability for isolating the budget of the emissions from the targeted city. In this regard, I think that the conclusions are a bit optimistic.

An additional caveat has been added to the conclusion section on this point.

3) A critical variable in the study is the wind which is used to compute fluxes. Comparisons between measured and modeled (UK Met Office) winds along the transects but also all around the London Greater area could potentially provide some strong insights on the robustness of the transport model, of the estimate of the measurements spatiotemporal footprint and of the estimate of the surface emissions (in particular if biases arise in the comparisons). I feel that it deserves some analysis.

The wind field does indeed have a strong influence on the flux, which is why we have adopted the approach here of taking flux density ratios (rather than concentration ratios). Within the boundary layer the modelled wind speeds are generally higher than the corresponding measurements, both upwind and downwind of Greater London. We account for this by using the modelled wind speed to calculate the simulated flux density, on the assumption that the model overestimation of wind speed will result in a corresponding underestimation in simulated concentration enhancement. We have expanded the discussion of this point in Sect. 3.1.1 and included a figure showing both model and measured wind speeds throughout the flight.

The impact of the overestimated model wind speed on the spatial extent of the footprint is far more subtle and difficult to account for. Given the high bias of the model wind speeds, it is reasonable to assume that the air history likely underestimates the spatial spread of the sample footprint, resulting in the in-plume measurements having a higher simulated sensitivity to emissions from Greater London. This in turn could introduce a low bias into the inventory scale factors.

Any inaccuracy in wind direction across the model wind field also clearly contributes to the uncertainty in this method. Referee 1 points out the mismatch between simulated and measured plume position, which is likely to be a consequence of inaccuracy in the model wind field. This too highlights a potential source of bias, as the air histories for in-plume and background periods simulated by NAME may differ slightly from the actual air histories of the measurements.

The obvious way to investigate the impact of wind field inaccuracy on the uncertainty budget would be to conduct a sensitivity test, where an ensemble of NAME runs are performed driven by a set of met data with perturbed wind fields. This would be an interesting study, but is quite involved from a modelling perspective and goes well beyond the simple use of NAME in this study. We have added a discussion of this potentially significant source of uncertainty in Sect. 3.1.2.

**Detailed comments:**



- p211: explain that "top-down" relates to methods based on atmospheric measurements and models ?

Explicit statement of this added

- p215-6: do power plant represent a large fraction of the CO<sub>2</sub> emissions in the greater London area ?  
on the same topic: I had in mind that the city had large power plants in its vicinity that could represent a major share of the emissions in the measurement footprint (<http://naei.beis.gov.uk/data/gis-mapping>): is it the case ? if yes, it would feed my main concern (2)

Within Great London power plants represent a small fraction of the emissions (<5%). However, power plants in the areas surrounding Greater London do constitute a significant source of emissions, with power plant emissions (including energy from waste facilities) summing to over 25% of the Greater London total. So the referee's main point 2) is valid (see discussion of this above) – it is not possible to isolate the Greater London from surrounding sources using either method presented here, and we have altered the phrasing of the method discussion to clarify this. However, this point also emphasises the advantage of the flux-dispersion method over the mass balance method, as fluxes outside Greater London actively bias the mass balance method results, whereas these surrounding power plant emissions are accounted for in the flux-dispersion method (their presence only acts to reduce the selectivity of the results to the Greater London region).

- p2115: I am not sure about the meaning of "bulk area flux" here. What would prevent atmospheric inversion to provide such a bulk area flux based on the same data ? see my main point (1)

Yes looking back we agree this is a false distinction – this sentence has been removed anyway in response to main point 1.

- p2121-33: I feel that the problem of defining the footprint of the estimated flux is presented in an "inverted" way which makes things more complicated than they are. In particular there is no reason to necessarily involve inventories in this problem.

This paragraph has been edited to address the comments of both reviewers. We agree that the emphasis was previously placed too strongly on the comparison with inventory fluxes – the fundamental issue is that, for non-isolated cities, the top-down flux cannot easily be ascribed to a well-defined region. This in turn does make it difficult to compare bottom-up and top-down fluxes using the mass balance method – we have tried to make this narrative clearer in the revised text.

\* section 2.2 - this section should provide the duration and the period of the day corresponding to the flight. Maybe I missed it in the following, but the time of the measurements is a critical information that can raise questions regarding the temporal representativity and the robustness of the computations

Requested details added – we agree that this helps to interpret the flux values derived in subsequent sections in the context of the diurnal variability of these fluxes.

- p4111: I do not understand the end of the sentence ("so as to assess the representativeness ...") in its context

Changed "representativeness" to "accuracy" to clarify what is meant here.

- p4113: "less than 24 hours" -> 24 hours is large if considering the need to connect the measurements to an emission footprint both in space and in time, and given the strong diurnal variations of the fluxes. Can the statement be more precise based on NAME simulations ?

This has now been made explicit as an average transit time of 20 hours over the British Isles. It is true that diurnal variability in fluxes over this timescale could effectively weight the sensitivity of the derived flux ratios to regions the air passed over during times of peak emission (e.g. rush hour). However, from Fig. 4 it can be seen that the aggregate air histories for in-plume and background sampling begin to converge upwind of London, and certainly by the time the particles leave the domain there is little discernable difference between the distribution of particles for each period. Fluxes in regions that contributed equally to both background and in-plume measurements have no effect on the results, so despite the fact the average transit time over the British Isles is 20 hours, the results are sensitive to fluxes over the much shorter transit time before the two aggregate air histories converge.

\* section 3 (beginning) -p5130: maybe you should already clarify here the fact that NAEI provides annual budgets of the emissions only, while the measurement were made during day time in March, which corresponds to a period of relatively high emissions (this information is limited to the discussions on the CH<sub>4</sub> results, and just ignored for CO and CO<sub>2</sub> in section 3.1.2). Using constant emissions in the model may also be problematic because the duration of the measurement campaign is about 2.5h, during a period of the day when emissions could be highly variable.

Explicit statement of this added

-p611-3: this will be forgotten when discussing the results, while this potentially weakens the confidence in the results from both methods; but this inter-annual change at the national scale may be negligible compared to the seasonal, day-to-day and diurnal variations biasing the comparison between annual budgets in NAEI and the flux estimates for daytime in March (see my comment above)

Point added

\* section 3.1.1 -p6122-23: The sentence (especially "enabling us to specifically assess accuracy. . .") seems to ignore the significant fluxes upwind and downwind London; see my point (2)

Agreed this statement was too strong. This section has been amended in line with point 2) to clarify that, while one can choose a threshold to optimise the selectivity of the results towards the region of interest, there will inevitably be some influence from a wider region.

-p6131: the latitudinal gradient is not fully accounted for since the background to be removed from local concentrations is taken as a constant value (the average between the north and south backgrounds) rather than as a linear interpolation between the north and south backgrounds; these north and south backgrounds sometimes seem to strongly differ: isn't it an issue (at least as significant as the one raised on p711-2) ?

We have repeated the flux-dispersion analysis with an interpolated (rather than averaged) background value used across each transect, and each ratio changed by less than 0.01. We have made reference to this in the paper. See also the discussion of this section in our reply to Referee 1 above.

\* section 3.1.2 - p7117: do the measurements and/or simulations show a significant change of vertical gradients in the concentrations when crossing this BLH ~750m (it does not seem to be the case in Figure 2) ? does the vertical distribution of the concentrations say something about the reliability of the model ?

The vertical distribution of concentrations outside the plume looks similar in the simulated and measured datasets. However, the simulated flux density enhancements are smaller relative to the measured enhancements when sampling above the model boundary layer height. As the simulated dispersion above the model boundary layer height is known to be less accurate we did not include this data.

A plausible explanation for underestimation of the simulated plume magnitude above 750 m would be if the simplified turbulence parameterisation above this height led to the suppression of vertical mixing in the model. In such a case the simulated plume magnitude within the model boundary layer could be consequently overestimated. A full investigation into the impact of turbulence parameterisations on the vertical mixing within the NAME model would require a separate study, but we have added a brief discussion raising this issue as a potential source of bias.

- p7129: see my main point (2), you need strong assumptions to apply the scaling factors derived for a large part of the South of England to the Greater London area.

Sentence added to re-emphasise the influence of surrounding sources on the results.

- p7133: I think that this statement is a bit extreme, especially since several investigations could be led to provide insights on the transport uncertainties: the analysis of the wind fields (see my main point (3)), of the 2D vertical structure of the concentration measurements, and, maybe, of the measurements around the Greater London area that are not exploited in this study

Yes fair point – an ensemble NAME run using perturbed met data could be used to quantify some of the uncertainty associated with the dispersion modelling. As stated above, we feel this is beyond the scope of the study here, but we have expanded the discussion of dispersion model uncertainty and highlighted this as a topic for future study.

- p8120-23 are a bit confusing. I do not really catch how the spatial distribution will be tackled along with the temporal variability.

This section has been reworded to make it clearer. Essentially we are trying to stress the point that more flights would be required to capture temporal emission variability (and reduce the impact of random errors).

- p8130: the human respiration could also be listed as a source of mismatch ?

We have added explicit reference to this as a component of the higher heterotrophic respiration within the city.

- p8 in a general way: the authors should try to better connect and discuss together the results for CO and CO<sub>2</sub>: why the scaling factors are so different for these two species ? is it due to the natural CO<sub>2</sub> fluxes only ? would not it say something about these natural fluxes ?

We've added a paragraph discussing this. The differences in emission ratios for several key sources makes it a bit of a stretch to attribute all of the difference to the net biospheric flux, but it provides a useful ballpark guide to the potential magnitude of these fluxes.

- p8131-32: "we can expect them to underestimate" -> shortcut

Changed to "we expect them to underestimate"

\* section 3.2.1 -p9130: "horizontal boundaries" could be rephrased for clarity. Could the definition of the background as the average concentrations over the 15-km boundary sections be too crude for focusing the emission estimate on the Greater London area (is the 15 km distance too short) ? does this background fit well with the background estimated with the flux dispersion method ?

“Horizontal boundaries” has been rephrased. The definition of the background here is crude, but as per the footprint it isn’t clear that a more robust method to define where the plume ends and the background begins exists. Simply eyeballing the data and selecting where the plume ends is a fairly typical approach used in many previous studies. Other studies use some statistical threshold (e.g.  $3\sigma$  less than the mean mole fraction), but these are in essence equally arbitrary. The average background values used are quite close to those used in the flux-dispersion method – we’ve added these values to the text.

The alternative approach of interpolating (rather than averaging) the background values has been tested. This is discussed in our response to Referee 1 above. We have expanded the discussion on uncertainties associated with the choice of background in Sects. 3.2 and 3.3. See also the response to the final comment below.

-p1011-3: the discussion goes a bit too fast for me. One could also assume that the upwind concentrations are more suitable to define a background for the measurements downwind London because they would characterize a section across their footprint that is relatively close to the sea (Figs 1 and 4). Discussing the impact of BLH on background concentrations could mean that these background concentrations are mainly driven by fluxes that are relatively close to the measurements. However, the concentrations North and South of the transects A-B are mostly influenced by fluxes North and South of London that are hardly seen by the measurements downwind London, as indicated by Figure 4. In a more general way, I think that the characterization of the "background concentrations" and footprint for the measurements downwind London could be better discussed (see my main point (2)).

We have edited and expanded this section to better discuss the pros and cons of each method for determining the background. Ideally we would define the background so that it represents the mole fractions throughout the downwind plane that would be measured in the absence of any sources from within Greater London. Were we able to calculate this hypothetical value it would solve the issue regarding the definition of aggregation area – if all extraneous sources were accounted for in the background then all enhancements in the downwind plane would only emanate from emissions within Greater London, so aggregating inventory emissions within the area would be reasonable. So, as discussed in our response to Referee 1, the issues raised here with the background definition is essentially another way to express the main issue regarding the inventory aggregation area raised in this paper. We have edited the discussion in Sects. 3.2 and 3.3 to cover this.
